# Supplementary material
Source: publisher figshare collection journal article supplement (https://geolsoc.figshare.com/articles/dataset/_/3453032)

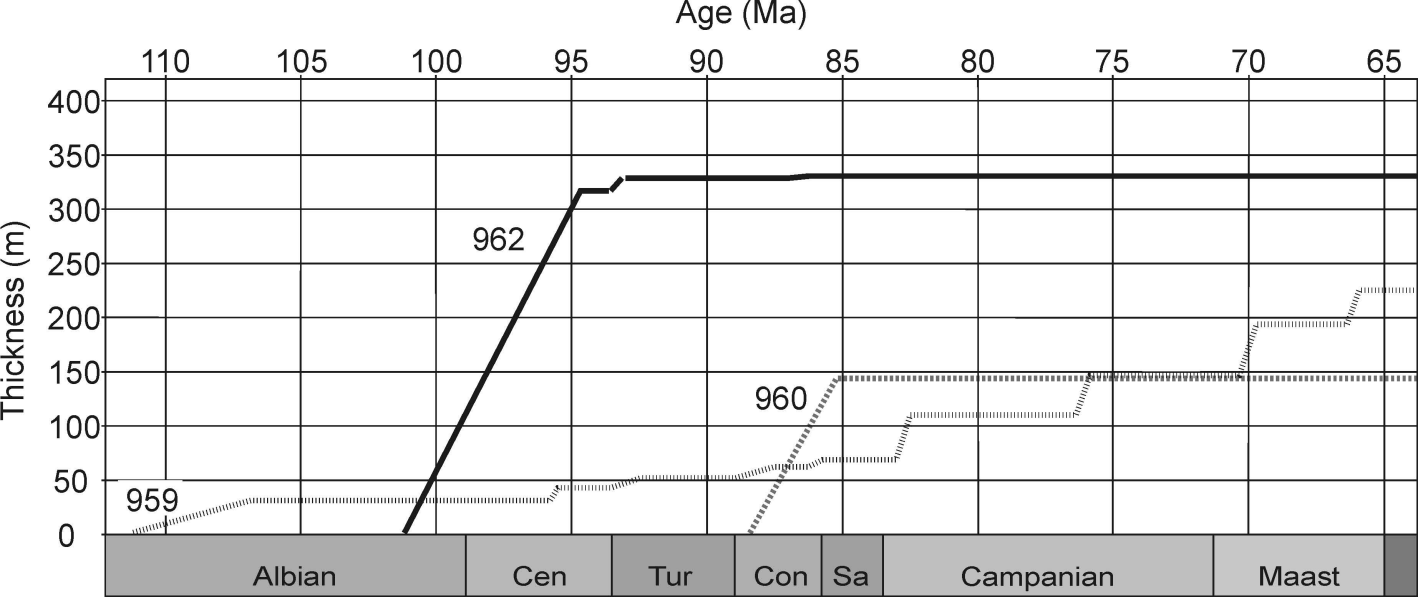

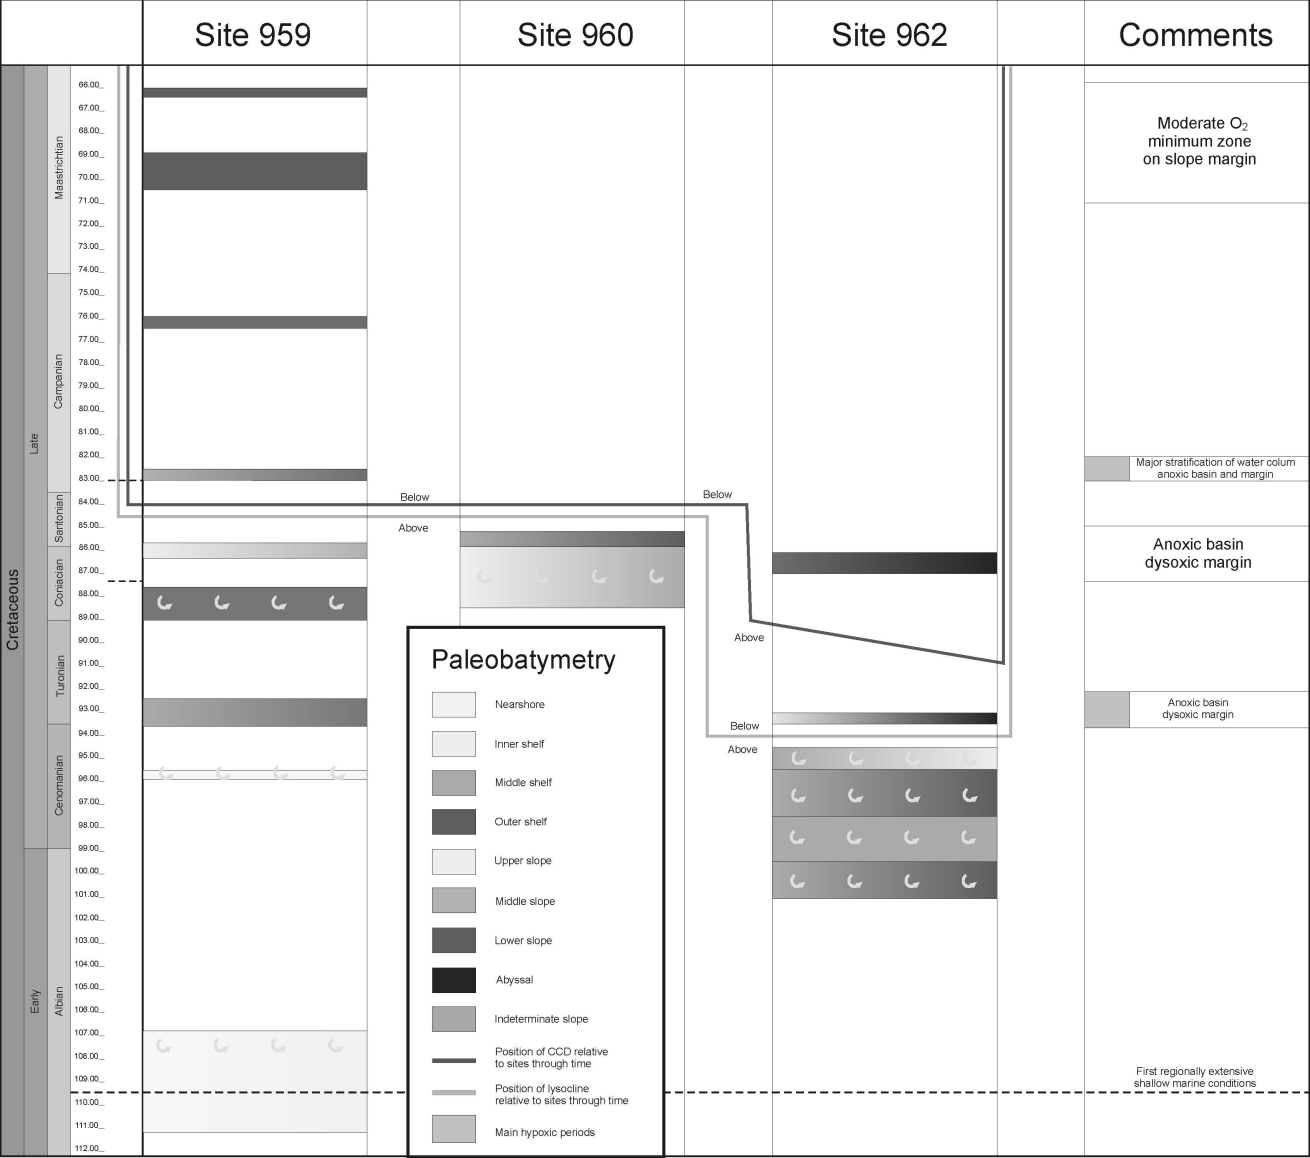

I

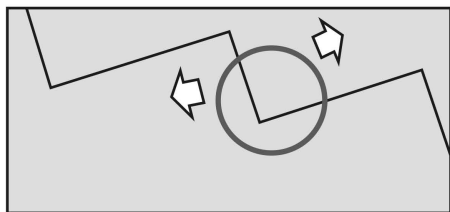

II

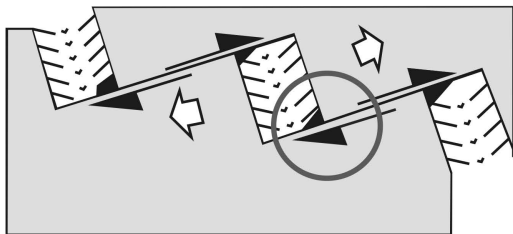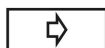

Divergence

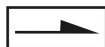Transform motion between  
continental crusts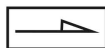Transform motion between  
oceanic crusts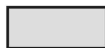Continental crust  
of normal thickness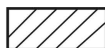

Thinned continental crust

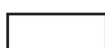

Oceanic crust

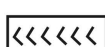

Axis of mid-ocean ridge

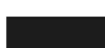

Marginal ridge

III

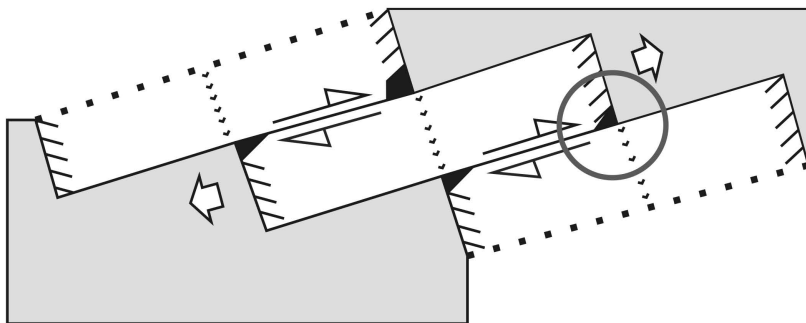

IV

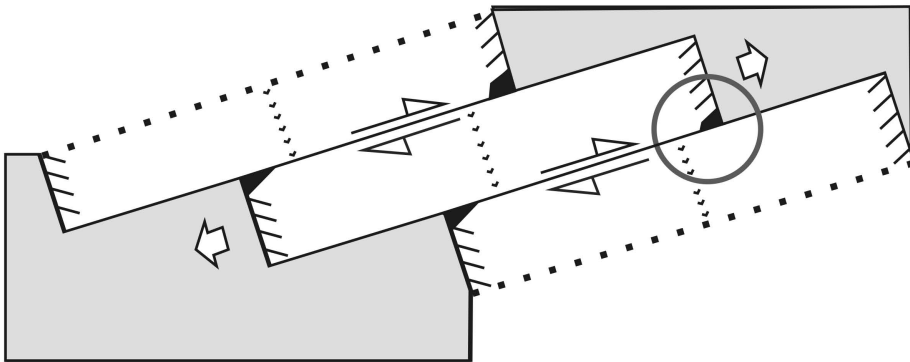

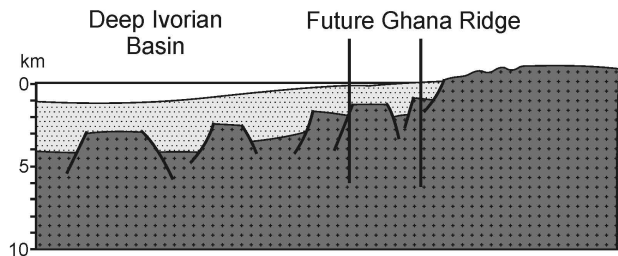

1. Rifting stage, Early Cretaceous

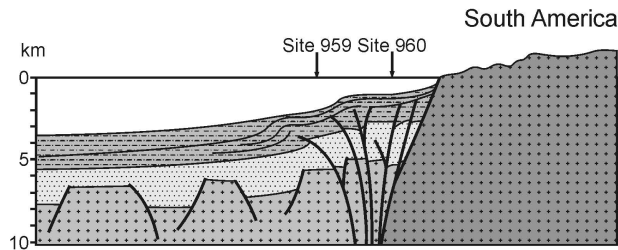

2. Syn-transform stage, Aptian-Albian

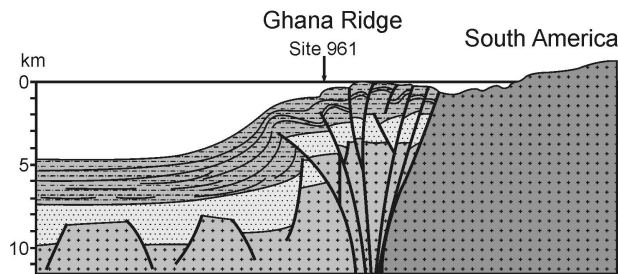

3. End of syn-transform stage, late Albian

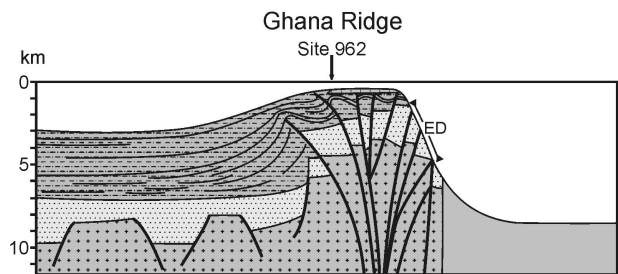

4. Passive margin stage, Late Cretaceous

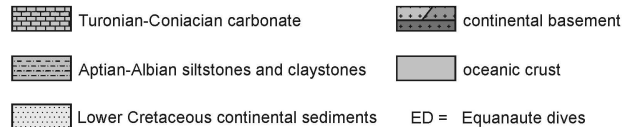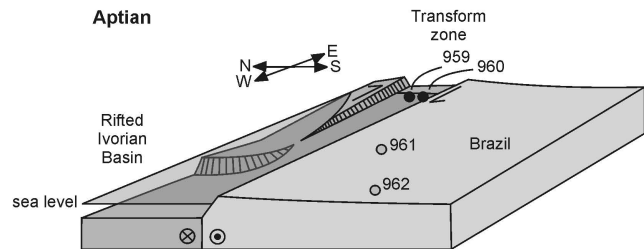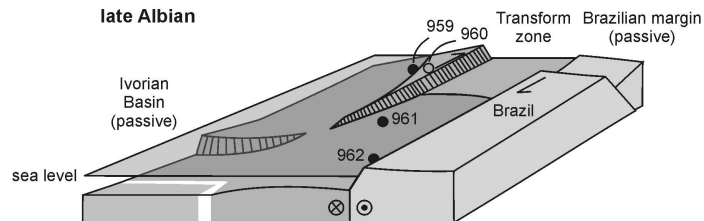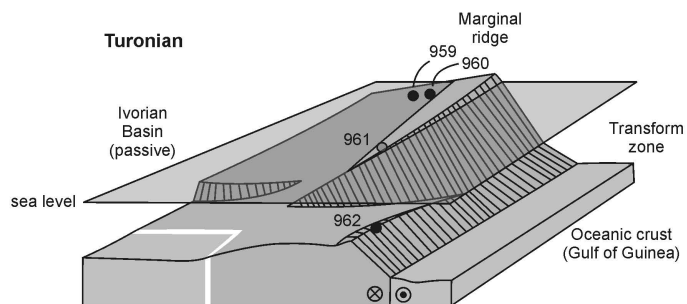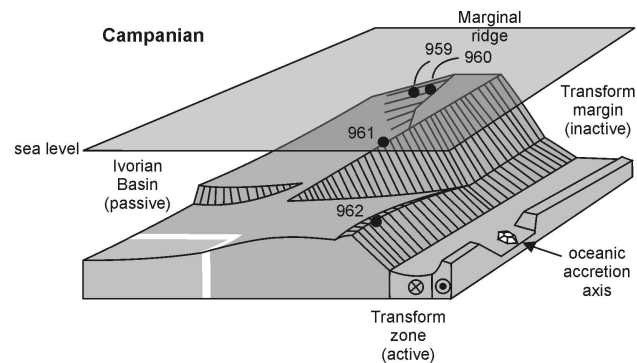

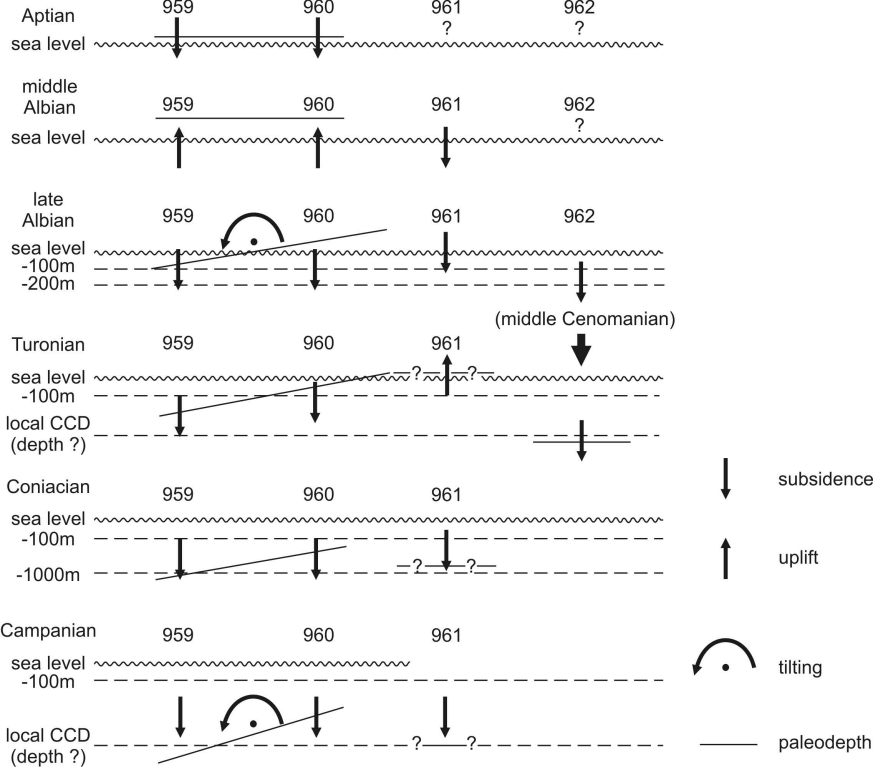

Supplement: Supplementary file 1 [file 1]
