# Supplementary material
Source: publisher figshare collection journal article supplement (https://geolsoc.figshare.com/articles/dataset/_/3453032)

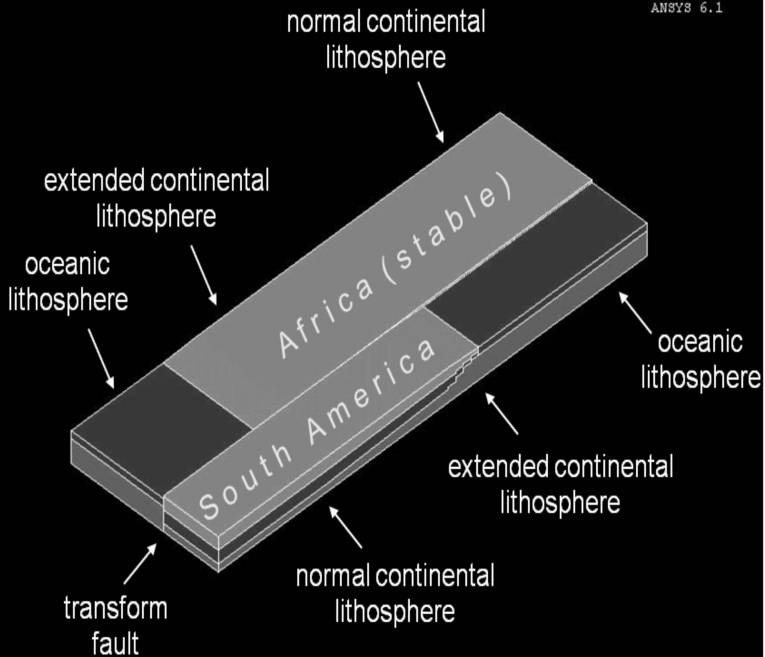

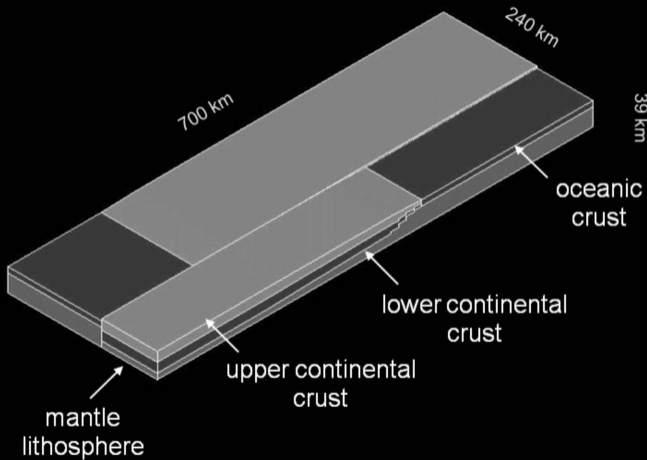

free upper surface

no horizontal  
movements at  
side walls

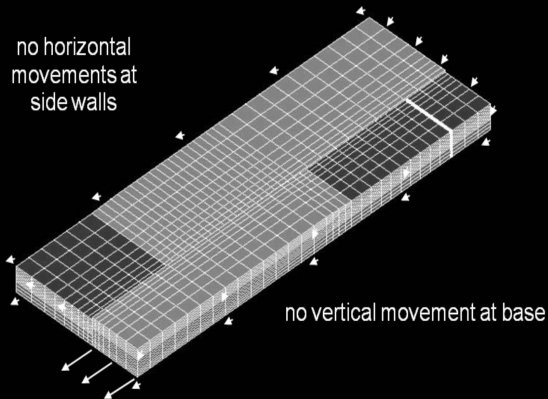

no vertical movement at base

displacement defined by  
kinematic model

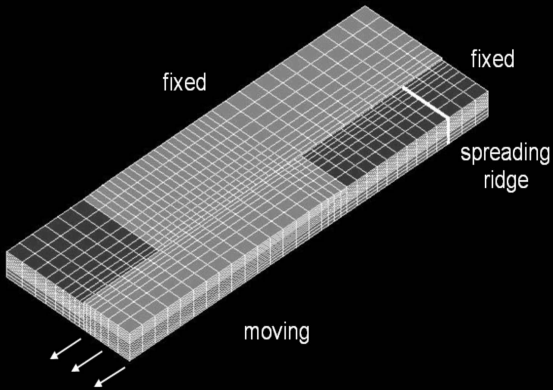

Supplement: Supplementary file 4 [file 1]
