# Supplementary material
Source: publisher figshare collection journal article supplement (https://geolsoc.figshare.com/articles/dataset/_/3453032)

# Ghana Ridge uplift in models S3a and S3c

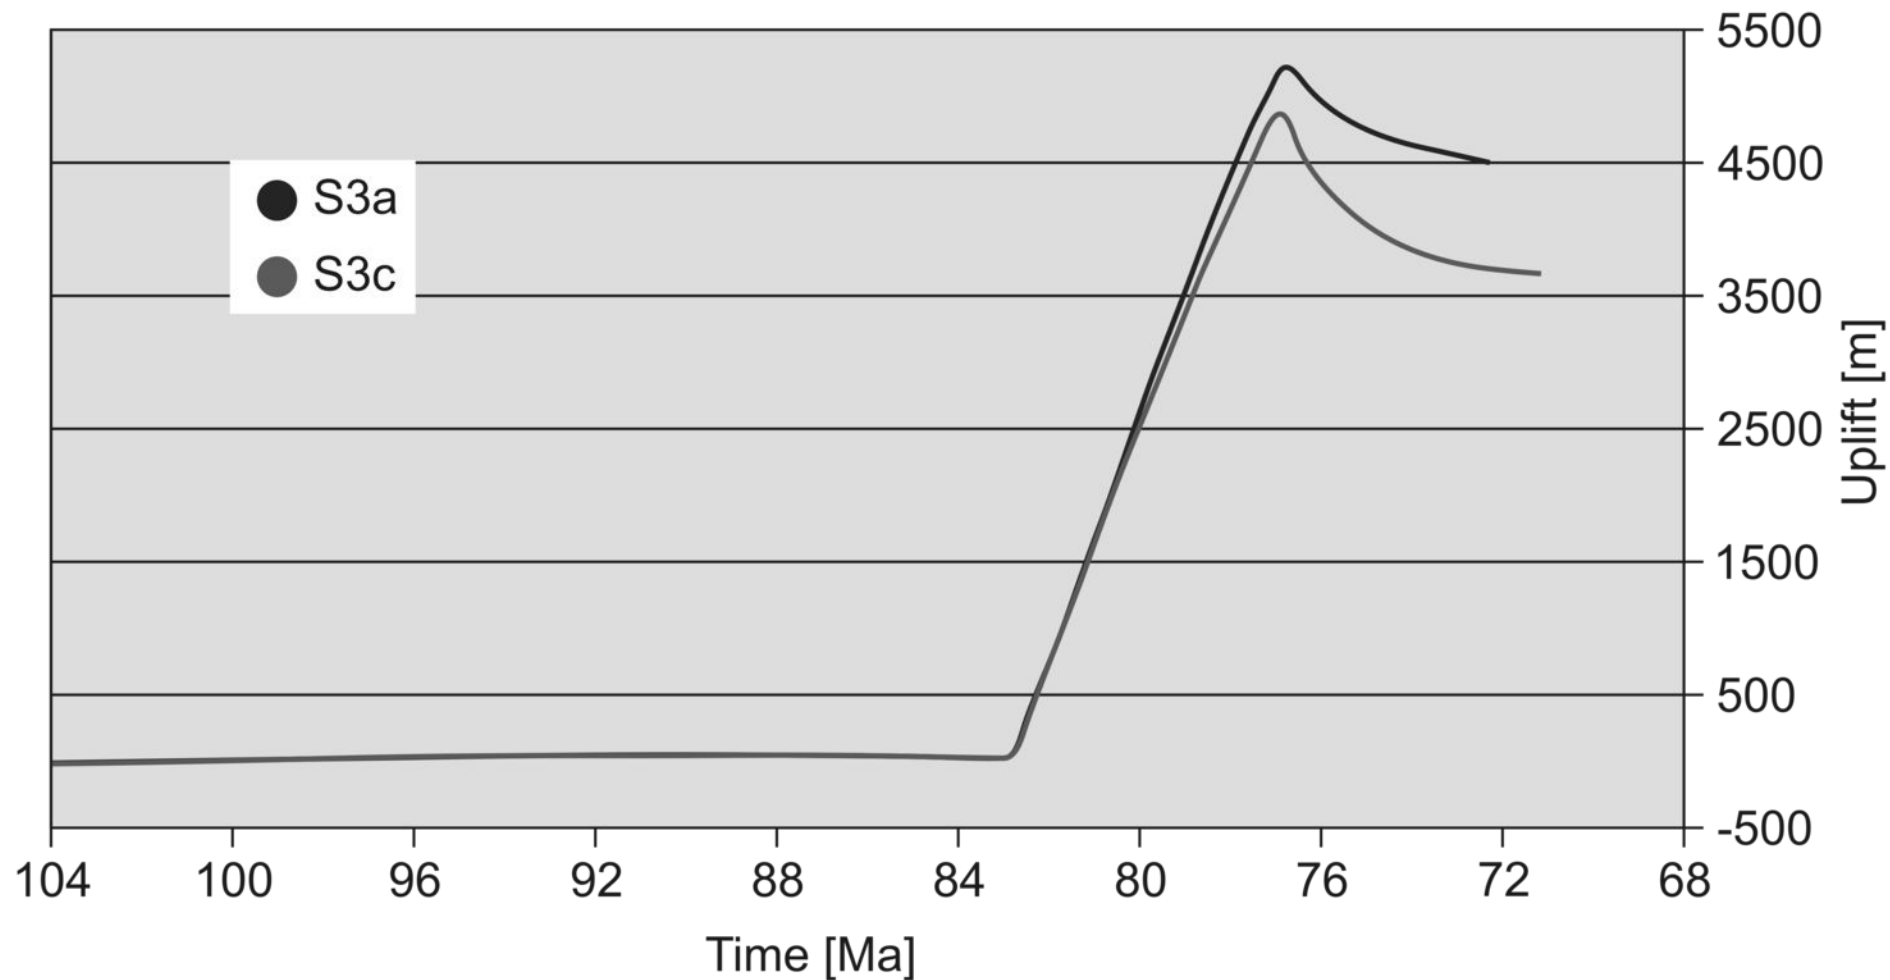

Supplement: Supplementary file 2 [file 1]

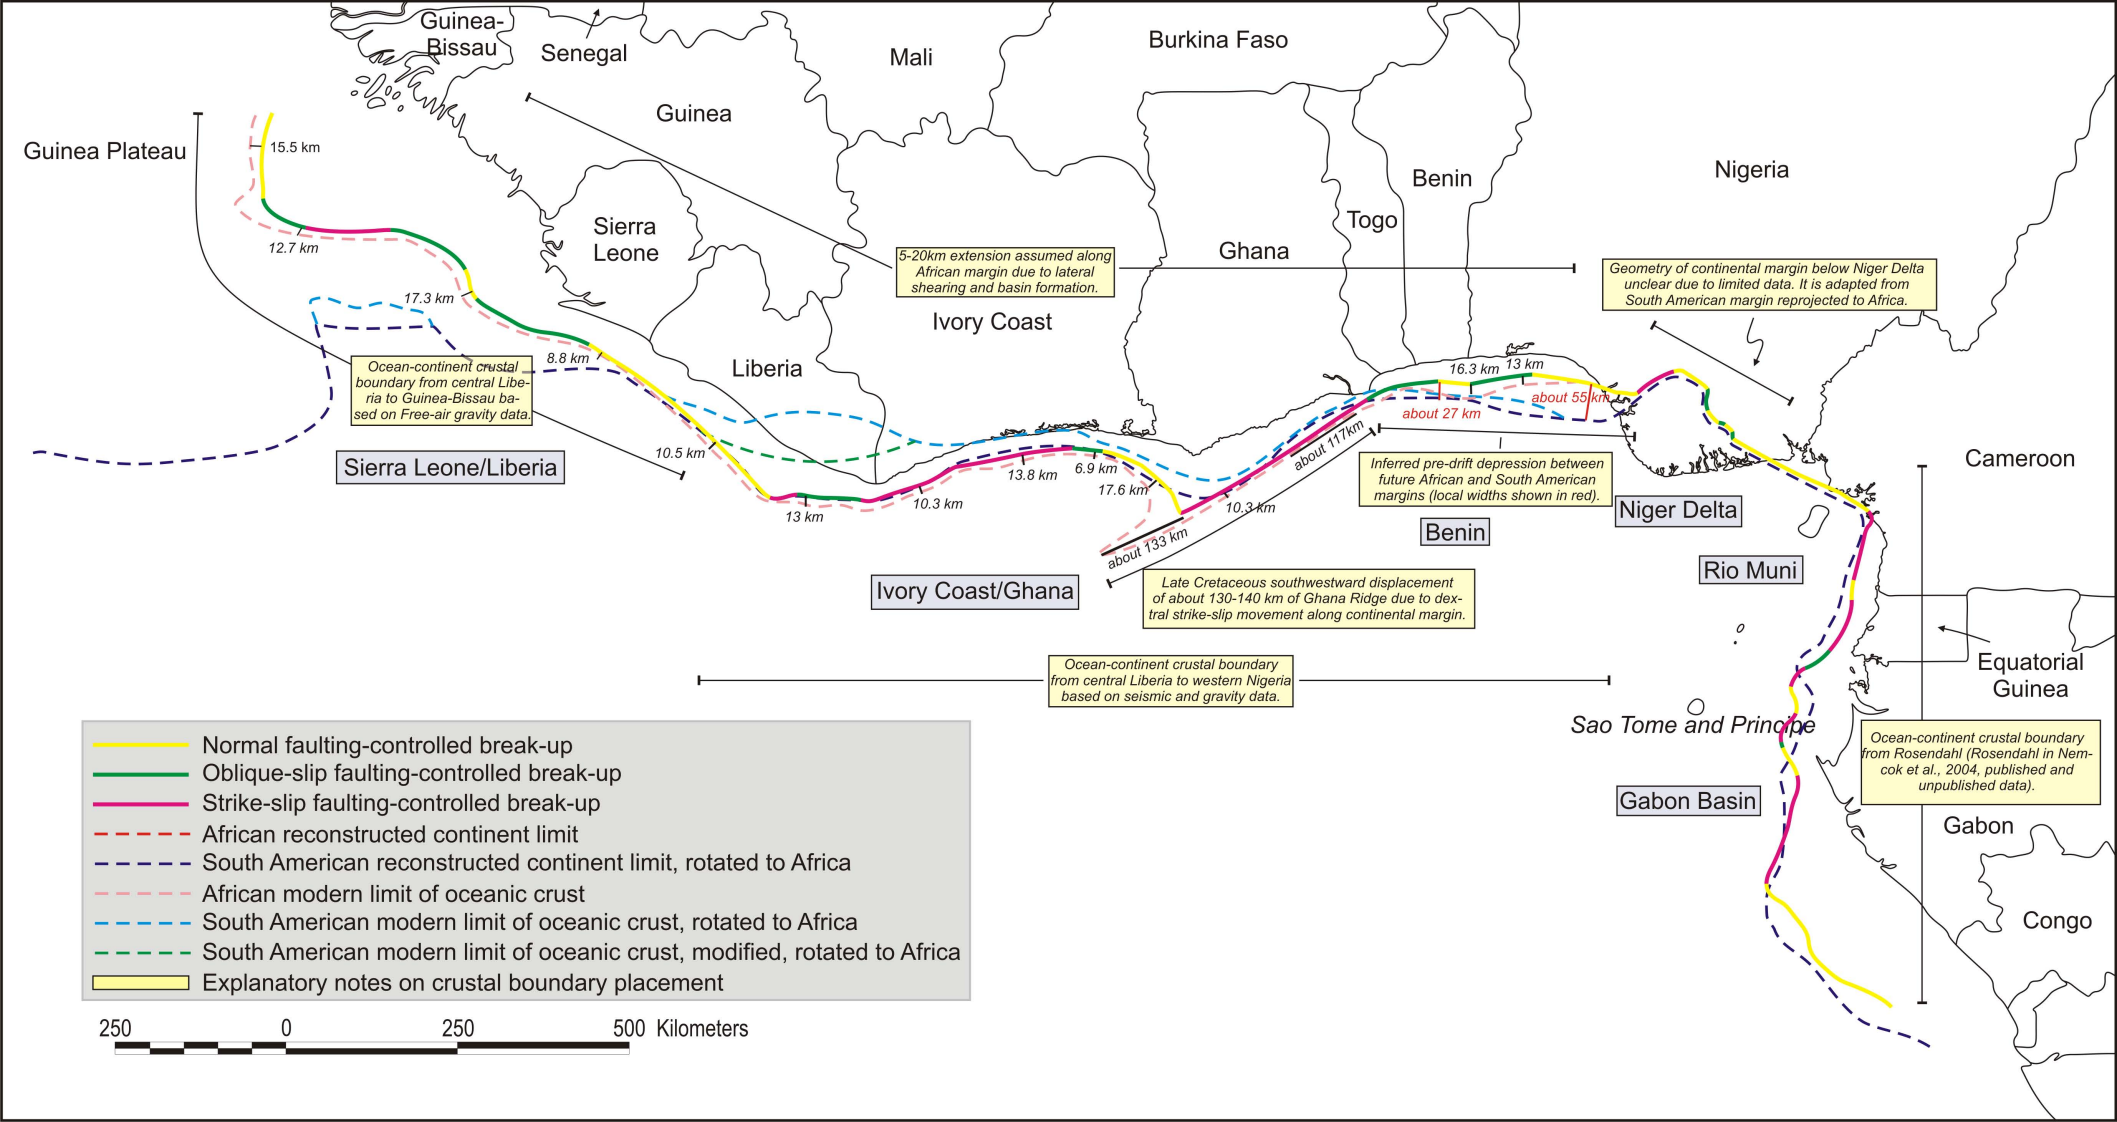

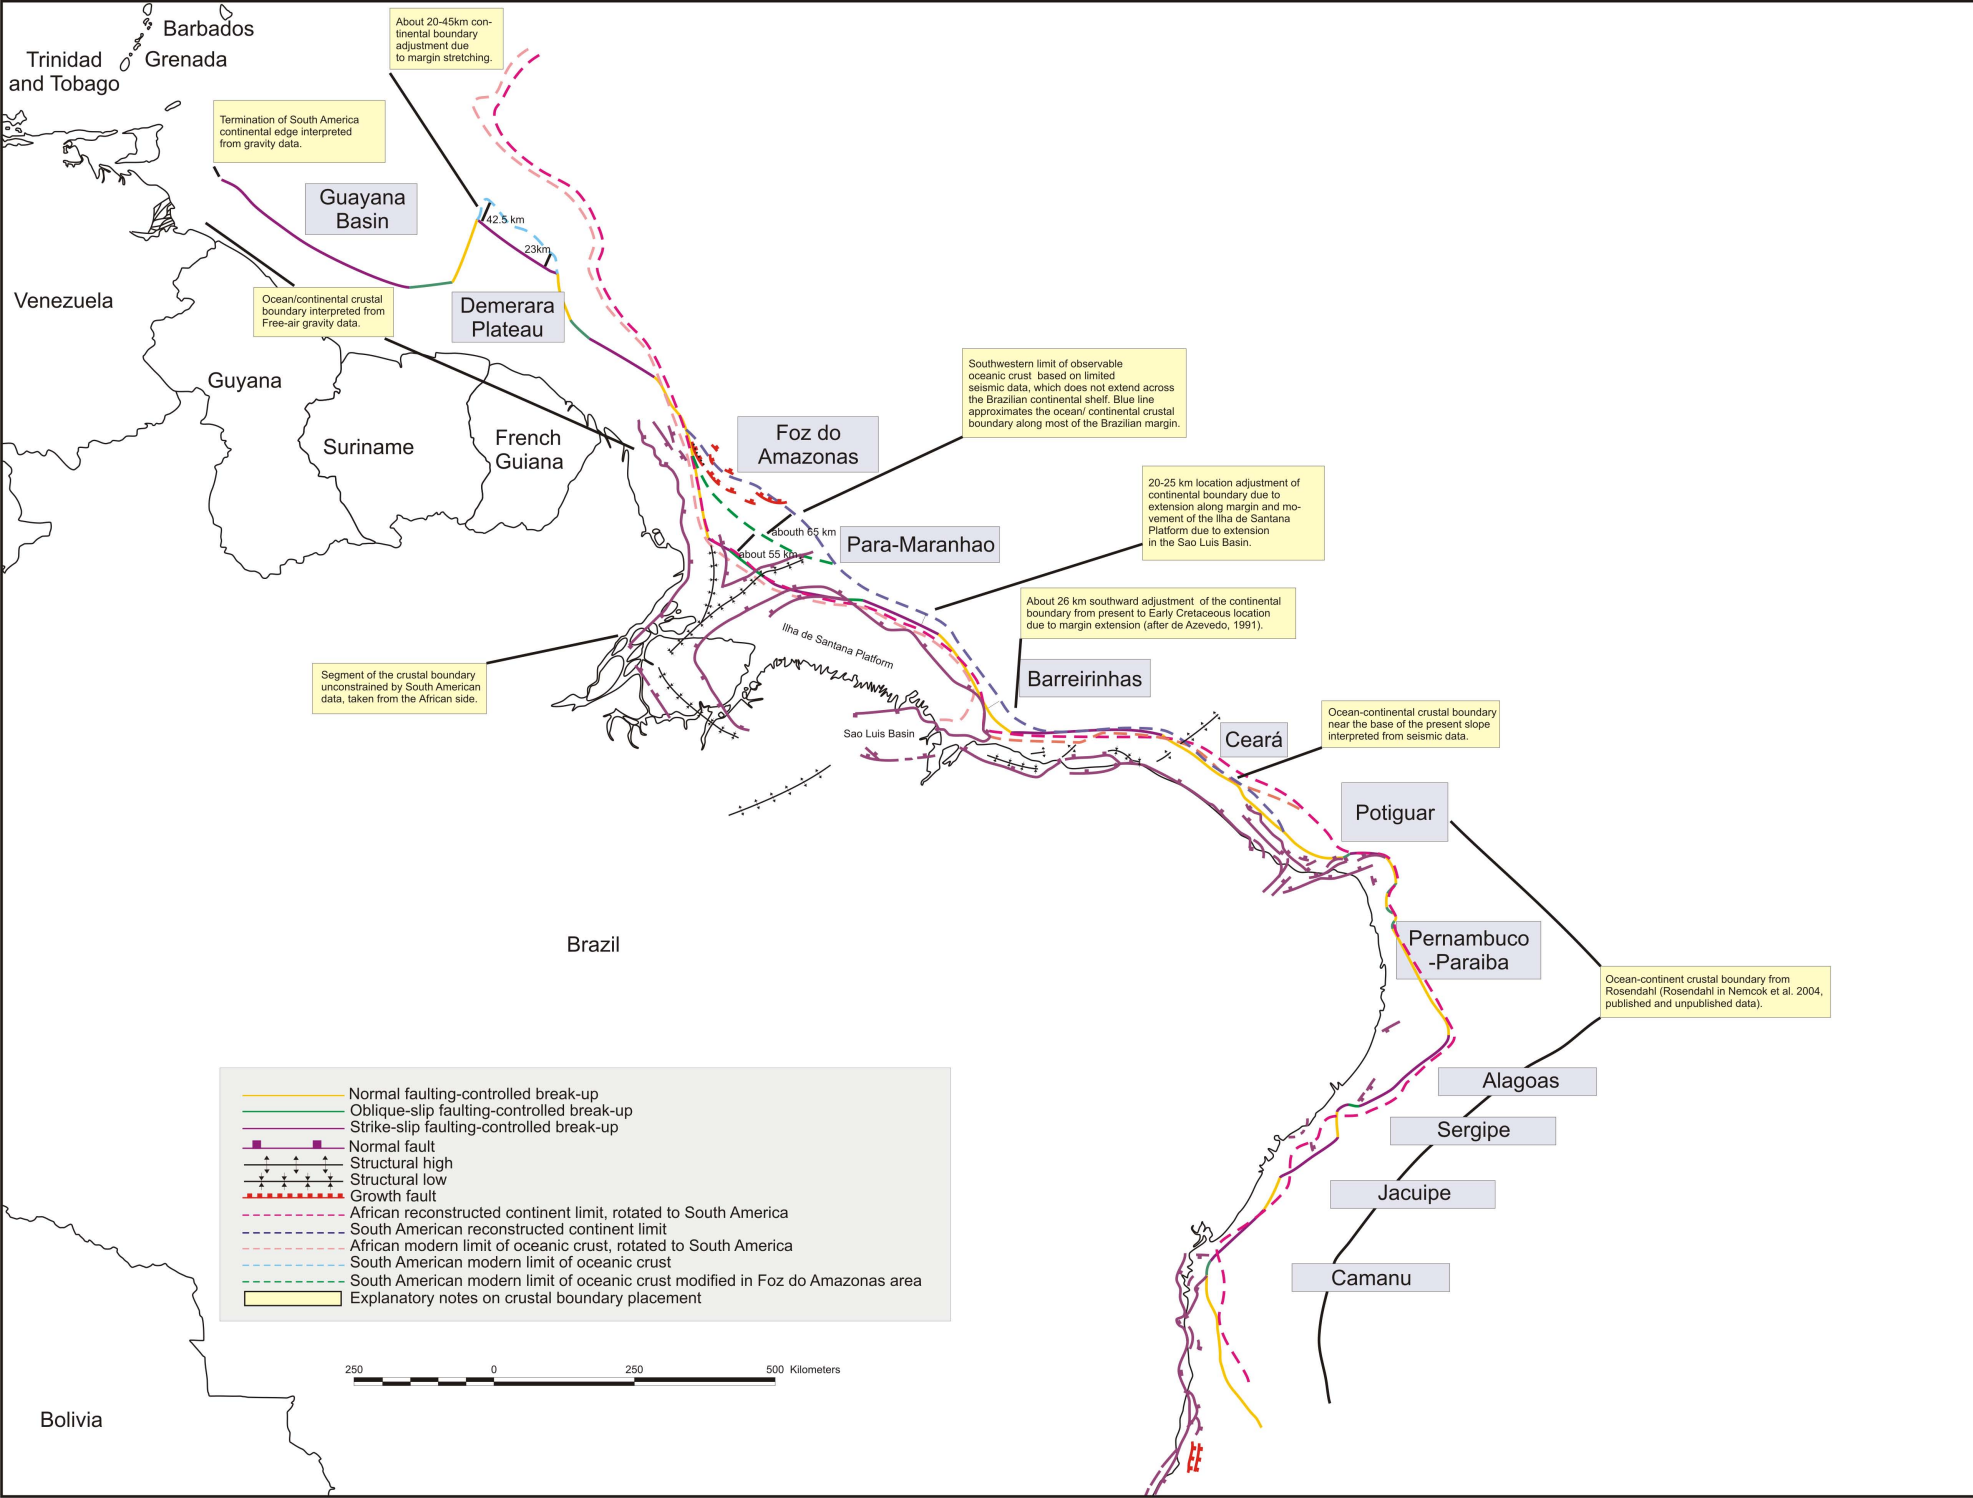

Supplement: Supplementary file 3 [file 1]
